# Supplementary material for: The importance of maternal diet quality during pregnancy on cognitive and behavioural outcomes in children: a systematic review and meta-analysis
Source: PubMed Central journal article supplement — BMJ Open. 2017 Sep 24;7(9):e016777. doi: 10.1136/bmjopen-2017-016777 (PMC5623570; doi:10.1136/bmjopen-2017-016777), 2017-09-24
Supplement: bmjopen-2017-016777supp001.pdf [file bmjopen-2017-016777supp001.pdf]

Supplementary table 1: Example of full search string (Ovid)

|    | Searches                                                                                                                                                                                                                                                                                                                                                                                                                                                                                                                                    | Results |
|----|---------------------------------------------------------------------------------------------------------------------------------------------------------------------------------------------------------------------------------------------------------------------------------------------------------------------------------------------------------------------------------------------------------------------------------------------------------------------------------------------------------------------------------------------|---------|
| 1  | (Maternal* or prenatal* or perinatal* or gestational* or pregnan*)                                                                                                                                                                                                                                                                                                                                                                                                                                                                          | 1768624 |
| 2  | (diet*3 or nutrition or fiber or fibre or protein or fat or fatty or carbohydrate or fruit or vegetable or fish or seafood)                                                                                                                                                                                                                                                                                                                                                                                                                 | 7878460 |
| 3  | child* or toddler* or offspring                                                                                                                                                                                                                                                                                                                                                                                                                                                                                                             | 3862890 |
| 4  | (behavior?r or behavior?r disorder* or externali?ing or internali?ing or mental health or mental development or learning disorder* or cogniti*3 or neurocogniti*3 or memory or IQ or executive or ADHD or attention deficit hyperactivity disorder or Attention deficit disorder or oppositional defiant disorder or conduct disorder or development* disability or neurodevelopment* or autism spectrum disorder or hyperkinetic disorder or hyperactivity disorder or language or communication or affective or developmental milestone*) | 6446778 |
| 5  | Combine 1-4                                                                                                                                                                                                                                                                                                                                                                                                                                                                                                                                 | 11512   |
| 6  | Limit 5 to appropriate age group (infant – 12 years of age)                                                                                                                                                                                                                                                                                                                                                                                                                                                                                 | 8003    |
| 7  | Limit 6 to pregnancy                                                                                                                                                                                                                                                                                                                                                                                                                                                                                                                        | 4632    |
| 8  | Limit 7 to humans                                                                                                                                                                                                                                                                                                                                                                                                                                                                                                                           | 3316    |
| 9  | Limit to original articles                                                                                                                                                                                                                                                                                                                                                                                                                                                                                                                  | 2974    |
| 10 | Remove duplicates from 9                                                                                                                                                                                                                                                                                                                                                                                                                                                                                                                    | 2100    |

Supplementary table 2: Overview of control variables for each study

| Confounders                           | Barker et al (2013) | Bernard et al (2013) | Bolduc et al (2016) | Daniels et al (2004) | Davidson et al (2008) | Gale et al (2008) | Gustafsson et al (2016)** | Hibbeln et al (2007) | Jacka et al (2013) | Julvez et al (2016) | Mendez et al (2008) | Oken, Radensky et al (2008) | Oken et al (2016) | Oken, Østerdal et al (2008) | Pina-Camacho et al (2015) | Sagiv et al (2012) | Steenweg-de Graaff et al (2014) | Valent et al (2013) |
|---------------------------------------|---------------------|----------------------|---------------------|----------------------|-----------------------|-------------------|---------------------------|----------------------|--------------------|---------------------|---------------------|-----------------------------|-------------------|-----------------------------|---------------------------|--------------------|---------------------------------|---------------------|
| Alcohol                               |                     | X                    |                     | X                    |                       | X                 |                           | X                    |                    |                     |                     | X                           |                   | X                           |                           | X                  |                                 | X                   |
| Biomarkers                            |                     |                      |                     |                      |                       |                   |                           |                      |                    |                     |                     |                             |                   |                             |                           | X                  |                                 |                     |
| Birth complications                   | X                   |                      |                     |                      |                       |                   |                           |                      |                    |                     |                     |                             |                   |                             | X                         |                    |                                 |                     |
| Breastfeeding                         |                     |                      |                     | X                    |                       | X                 |                           | X                    |                    | X                   | X                   | X                           | X                 | X                           |                           |                    |                                 | X                   |
| Child gender                          |                     | X                    |                     | X                    | X                     |                   | X                         | X                    | X                  | X                   | X                   | X                           | X                 | X                           |                           | X                  | X                               | X                   |
| Child ADHD medication                 |                     |                      |                     |                      |                       |                   |                           |                      |                    |                     |                     |                             |                   |                             |                           | X                  |                                 |                     |
| Child age at assessment               |                     | X                    |                     | X                    |                       |                   |                           |                      |                    | X                   | X                   | X                           | X                 | X                           |                           | X                  | X                               |                     |
| Child birth weight                    |                     |                      |                     |                      | X                     | X                 | X                         |                      |                    | X                   |                     |                             | X                 | X                           |                           |                    |                                 | X                   |
| Child dietary pattern                 |                     |                      |                     |                      |                       |                   |                           |                      | X                  |                     |                     |                             |                   |                             |                           |                    |                                 |                     |
| Child fish intake                     |                     |                      |                     |                      |                       |                   |                           |                      |                    |                     | X                   |                             |                   |                             |                           |                    |                                 | X                   |
| Child sugary snacks/drinks intake     |                     |                      |                     |                      |                       |                   |                           |                      |                    |                     |                     |                             |                   |                             |                           |                    | X                               |                     |
| Daycare attendance                    |                     | X                    |                     |                      |                       | X                 |                           |                      |                    |                     |                     |                             |                   |                             |                           |                    |                                 | X                   |
| Ethnicity                             |                     |                      |                     |                      |                       |                   |                           | X                    |                    | X                   |                     | X                           | X                 |                             |                           | X                  | X                               | X                   |
| Fetal growth                          |                     |                      |                     |                      |                       |                   |                           |                      |                    |                     |                     | X                           |                   |                             |                           |                    |                                 |                     |
| Home environment                      | X                   |                      |                     | X                    | X                     |                   |                           | X                    |                    |                     |                     |                             | X                 |                             | X                         | X                  |                                 | X                   |
| Length of gestation                   |                     | X                    |                     |                      |                       |                   |                           | X                    |                    |                     | X                   | X                           | X                 | X                           |                           |                    |                                 |                     |
| Marital status                        | X                   |                      |                     |                      | X                     |                   |                           | X                    | X                  |                     |                     | X                           |                   | X                           | X                         | X                  | X                               | X                   |
| Maternal age                          |                     | X                    | X                   |                      | X                     | X                 | X                         | X                    | X                  | X                   |                     | X                           |                   | X                           |                           | X                  | X                               | X                   |
| Maternal energy intake                |                     | X                    |                     |                      |                       |                   | X                         |                      |                    | X                   |                     |                             |                   |                             |                           |                    | X                               |                     |
| Maternal diet*                        |                     |                      | X                   |                      |                       |                   |                           | X                    |                    |                     |                     |                             |                   |                             |                           | X                  |                                 | X                   |
| Maternal gestational diabetes         |                     |                      | X                   |                      |                       |                   |                           |                      |                    |                     |                     |                             |                   |                             |                           |                    |                                 |                     |
| Maternal IQ                           |                     |                      |                     |                      | X                     | X                 |                           |                      |                    |                     |                     |                             | X                 |                             |                           | X                  |                                 | X                   |
| Maternal mental health                |                     |                      |                     |                      |                       |                   | X                         |                      | X                  |                     |                     |                             |                   | X                           |                           | X                  | X                               |                     |
| Maternal pre pregnancy BMI            |                     |                      |                     |                      |                       |                   |                           |                      |                    |                     |                     | X                           |                   | X                           |                           |                    | X                               | X                   |
| Maternal pregnancy weight/weight gain |                     | X                    |                     |                      |                       |                   | X                         |                      |                    | X                   |                     |                             |                   |                             |                           |                    |                                 | X                   |
| Maternal supplement use               |                     |                      | X                   |                      |                       |                   |                           |                      |                    |                     |                     |                             |                   |                             |                           |                    | X                               |                     |
| Parental learning difficulties        |                     |                      |                     |                      |                       |                   |                           |                      |                    |                     |                     |                             |                   | X                           |                           |                    |                                 |                     |
| Parity                                | X                   | X                    |                     | X                    |                       |                   |                           | X                    |                    | X                   | X                   |                             | X                 | X                           | X                         |                    | X                               |                     |
| Paternal age                          |                     |                      |                     |                      |                       |                   |                           |                      | X                  |                     |                     |                             |                   |                             |                           |                    |                                 |                     |
| SES                                   | X                   | X                    | X                   | X                    | X                     | X                 | X                         | X                    | X                  | X                   | X                   | X                           | X                 | X                           | X                         | X                  | X                               | X                   |
| Smoking                               |                     | X                    |                     | X                    |                       | X                 |                           | X                    | X                  |                     |                     | X                           | X                 | X                           |                           | X                  | X                               | X                   |

\*For some studies where fish intake was the exposure, other maternal dietary components were included in the analysis as confounders.

\*\*All covariates did not significantly correlate with outcome, so these were not included in the final analysis

Supplementary table 3: Evaluation of individual study quality with The Newcastle-Ottawa Scale (NOS) for assessing the quality of non-randomised studies in meta-analyses

|                                                |                                                                                                                                                                                                                                                                                                                                         | Barker et al (2013) | Bernard et al (2013) | Bolduc et al (2016) | Daniels et al (2004) | Davidson et al (2008) | Gale et al (2008) | Gustafsson et al (2016) | Hibbeln et al (2007) | Jacka et al (2013) | Julvez et al (2016) | Mendez et al (2008) | Oken, Radensky et al (2008) | Oken, Østerdal et al (2008) | Oken et al (2016) | Pina-Camacho et al (2015) | Sagiv et al (2012) | Steenweg-de Graaff et al (2014) | Valent et al (2013) |
|------------------------------------------------|-----------------------------------------------------------------------------------------------------------------------------------------------------------------------------------------------------------------------------------------------------------------------------------------------------------------------------------------|---------------------|----------------------|---------------------|----------------------|-----------------------|-------------------|-------------------------|----------------------|--------------------|---------------------|---------------------|-----------------------------|-----------------------------|-------------------|---------------------------|--------------------|---------------------------------|---------------------|
| <b>Selection</b>                               | <b>1) Representativeness of the exposed cohort:</b><br>a) truly representative of the average pregnant woman in the community*; b) somewhat representative of the average pregnant woman in the community*; c) selected group of users e.g. nurses, volunteers; d) no description of the derivation of the cohort                       | c                   | c                    | c                   | c                    | c                     | c                 | c                       | c                    | c                  | c                   | c                   | c                           | c                           | c                 | c                         | c                  | c                               | c                   |
|                                                | <b>2) Selection of the non-exposed cohort:</b><br>a) drawn from the same community as the exposed cohort*; b) drawn from a different source; c) no description of the derivation of the non-exposed cohort                                                                                                                              | a                   | a                    | a                   | a                    | a                     | a                 | a                       | a                    | a                  | a                   | a                   | a                           | a                           | a                 | a                         | c                  | a                               | a                   |
|                                                | <b>3) Ascertainment of exposure:</b><br>a) secure record (e.g. surgical records)*; b) structured interview*; c) written self-report; d) no description                                                                                                                                                                                  | c                   | c                    | c                   | c                    | a                     | c                 | c                       | c                    | c                  | c                   | c                   | c                           | c                           | c                 | c                         | a                  | c                               | c                   |
|                                                | <b>4) Demonstration that outcome of interest was not present at start of study:</b><br>a) yes*; b) no                                                                                                                                                                                                                                   | a                   | a                    | a                   | a                    | a                     | a                 | a                       | a                    | a                  | a                   | a                   | a                           | a                           | a                 | a                         | c                  | a                               | a                   |
| <b>Comparability</b>                           | <b>1) Comparability of cohorts on the basis of the design or analysis:</b>                                                                                                                                                                                                                                                              |                     |                      |                     |                      |                       |                   |                         |                      |                    |                     |                     |                             |                             |                   |                           |                    |                                 |                     |
|                                                | a) study controls for SES (maternal education and/or income)*                                                                                                                                                                                                                                                                           | x                   | x                    | x                   | x                    | x                     | x                 | x                       | x                    | x                  | x                   | x                   | x                           | x                           | a                 | x                         | x                  | x                               | x                   |
|                                                | b) study controls for child dietary factors other than breastfeeding (e.g. dietary patterns, fish intake)*                                                                                                                                                                                                                              |                     |                      |                     |                      |                       |                   |                         | x                    |                    | x                   |                     |                             |                             | x                 | x                         |                    |                                 |                     |
| <b>Outcome</b>                                 | <b>1) Assessment of outcome:</b><br>a) independent blind assessment*; b) record linkage*; c) self-report; d) no description                                                                                                                                                                                                             | a                   | c                    | a                   | c                    | a                     | c                 | c                       | a/c                  | c                  | c                   | a                   | a                           | c                           | a                 | c                         | a                  | c                               | a                   |
|                                                | <b>2) Was follow-up long enough for outcomes to occur:</b><br>a) yes*; b) no                                                                                                                                                                                                                                                            | a                   | a                    | a                   | a                    | a                     | a                 | a                       | a                    | a                  | a                   | a                   | a                           | a                           | a                 | a                         | a                  | a                               | a                   |
|                                                | <b>3) Adequacy of follow up of cohorts:</b><br>a) complete follow up - all subjects accounted for*; b) subjects lost to follow up unlikely to introduce bias - less than 20 % lost or description of those lost suggested no difference from those followed*; c) follow up rate < 80% and no description of those lost; d) no statement | c                   | c                    | c                   | c                    | c                     | c                 | c                       | c                    | c                  | c                   | d                   | c                           | c                           | d                 | c                         | c                  | c                               | c                   |
| <b>Total number of stars</b>                   |                                                                                                                                                                                                                                                                                                                                         | <b>5</b>            | <b>4</b>             | <b>5</b>            | <b>4</b>             | <b>5</b>              | <b>4</b>          | <b>4</b>                | <b>5</b>             | <b>5</b>           | <b>4</b>            | <b>6</b>            | <b>5</b>                    | <b>4</b>                    | <b>5</b>          | <b>5</b>                  | <b>6</b>           | <b>4</b>                        | <b>5</b>            |
| <b>Quality rating according to guideline**</b> |                                                                                                                                                                                                                                                                                                                                         | <b>fair</b>         | <b>poor</b>          | <b>fair</b>         | <b>poor</b>          | <b>fair</b>           | <b>poor</b>       | <b>poor</b>             | <b>fair</b>          | <b>poor</b>        | <b>poor</b>         | <b>fair</b>         | <b>fair</b>                 | <b>poor</b>                 | <b>fair</b>       | <b>poor</b>               | <b>fair</b>        | <b>poor</b>                     | <b>fair</b>         |

\*=one star (marked in yellow when each respective study were given a star)

\*\*Thresholds for converting the NOS rating to Agency for Healthcare Research and Quality - AHRQ - standards (good, fair, and poor):

**Good quality:** 3 or 4 stars in Selection domain AND 1 or 2 stars in Comparability domain AND 2 or 3 stars in Outcome domain

**Fair quality:** 2 stars in Selection domain AND 1 or 2 stars in Comparability domain AND 2 or 3 stars in Outcome domain

**Poor quality:** 0 or 1 star in Selection domain OR 0 stars in Comparability domain OR 0 or 1 stars in Outcome domain

Note: A study can be awarded a maximum of one star for each numbered item within the Selection and Outcome categories. A maximum of two stars can be given for Comparability
